# Supplementary material
Source: Springer Nature journal article supplement (http://www.springermedizin.de/resource/supplementary/12891_2007_353_MOESM3_ESM.pdf/9511122)

**A**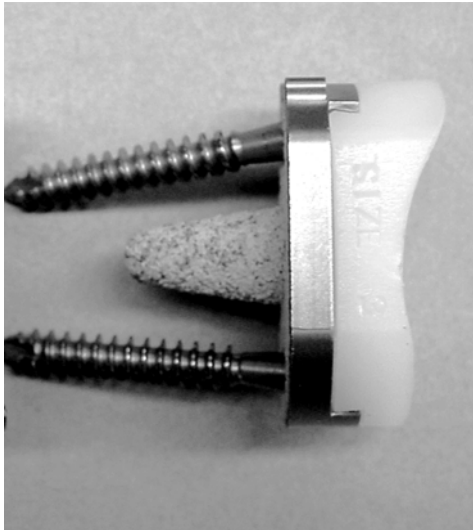**B**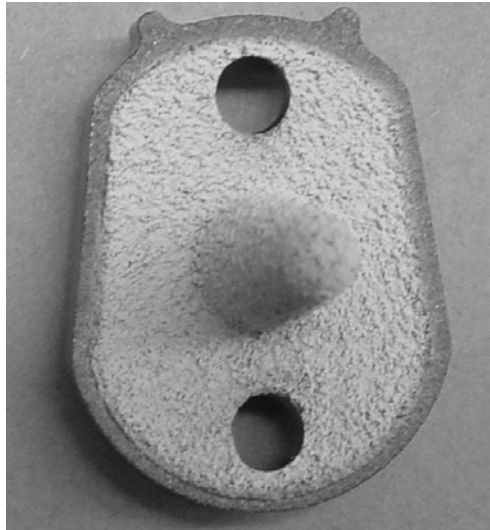

Supplement: MOESM3 [file 9511122]
